# Supplementary figures and images for: Single-Cell Profiling Reveals Immune-Based Mechanisms Underlying the Tumor Radiosensitization by a Novel Mn Porphyrin Clinical Candidate, MnTnBuOE-2-PyP<sup>5+</sup> (BMX-001)
Source: Preprints.org preprint supplement (doi:10.20944/preprints202402.0355.v1), 2024-02-06

**A**

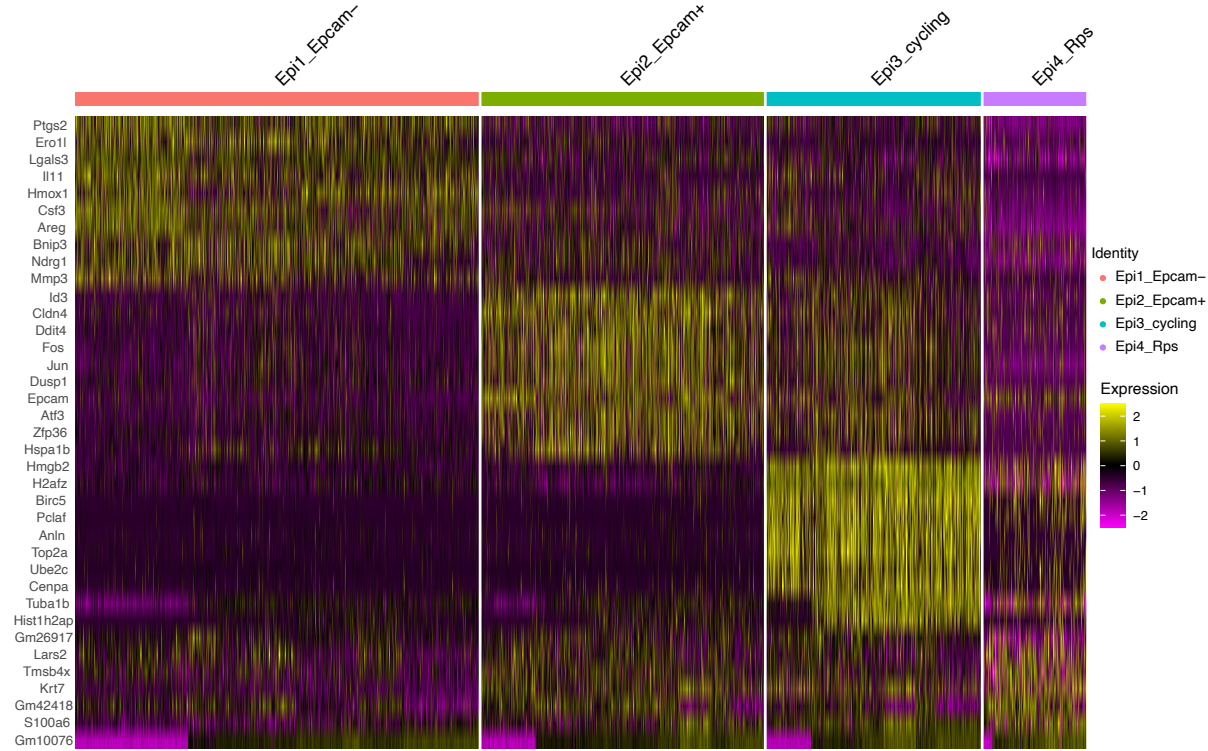

**B**

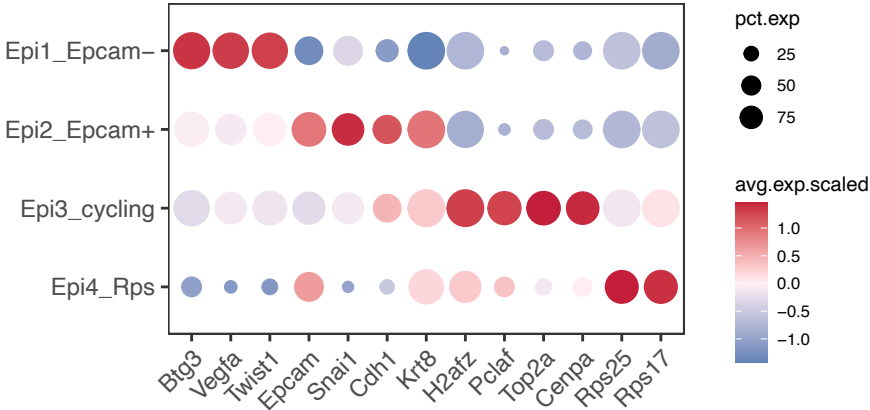

Supplement: Supplementary file 1 [file supplementary]
